# Supplementary material for: Scalable synthesis of Na2MVF7 (M = Mn, Fe, and Co) as high-performance cathode materials for sodium-ion batteries
Source: Royal Society of Chemistry journal article supplement (doi:10.1039/d1cc04449d), 2021-01-01
Supplement: d1cc04449d1.pdf [file d1cc04449d1.pdf]

Electronic supplementary information

**Scalable synthesis of Na<sub>2</sub>MVF<sub>7</sub> (M = Mn, Fe, and Co) as high-performance cathode materials for sodium-ion batteries**

*Jiaying Liao<sup>‡</sup>, Jingchen Han<sup>‡</sup>, Jianzhi Xu, Yichen Du, Liping Duan, Yingying Sun and Xiaosi Zhou\**

Jiangsu Key Laboratory of New Power Batteries, Jiangsu Collaborative Innovation Center of Biomedical Functional Materials, School of Chemistry and Materials Science, Nanjing Normal University, Nanjing 210023, China

\*Corresponding authors.

E-mail: [zhouxiaosi@njnu.edu.cn](mailto:zhouxiaosi@njnu.edu.cn)

<sup>‡</sup> J. L. and J. H. contributed equally to this work.

## Experimental section

**Synthesis of  $\text{Na}_2\text{MVF}_7$  (M = Mn, Fe, and Co):**  $\text{Na}_2\text{MVF}_7$  was synthesized via a solid-state reaction method using polytetrafluoroethylene ( $-\text{CF}_2-\text{CF}_2-$ )<sub>n</sub> (PTFE, Dupont, diameter < 1  $\mu\text{m}$ ) as a fluorine source. Typically, NaF,  $\text{MC}_2\text{O}_4 \cdot 2\text{H}_2\text{O}$ ,  $\text{NH}_4\text{VO}_3$ , and PTFE were planetary ball-milled with a molar ratio of 2:1:1.05:2 in ethanol at a speed of 500 rpm for 12 h.  $\text{NH}_4\text{VO}_3$  was 5% excess to balance the subsequent evaporation of  $\text{VF}_3$ . After drying, the resulting mixture was pelletized and preheated at 550 °C for 1 h under flowing Ar. Thereafter, the pellet was intermediately ground to fine powder and further annealed at 650 °C for 1 h under an Ar environment to obtain the product of  $\text{Na}_2\text{MVF}_7$  (M = Mn, Fe, and Co). Note that  $\text{Na}_2\text{MVF}_7$  was economically synthesized without using expensive transition metal fluorides  $\text{MF}_2$  and  $\text{VF}_3$ .

**Materials characterization:** The crystal phases of as-obtained  $\text{Na}_2\text{MVF}_7$  (M = Mn, Fe, and Co) were characterized with an X-ray diffractometer (XRD; Rigaku, SmartLab). Rietveld approach was employed to refine the data sets using the GSAS package incorporated with the EXPGUI interface.<sup>1</sup> The morphology and structure of the samples were studied by scanning electron microscopy (SEM; JSM-7600F) and transmission electron microscopy (TEM; FEI Talos F200X). The elemental mappings were analyzed by energy dispersive X-ray spectroscopy (EDX) attached to the TEM instrument. Thermogravimetric analysis (TGA) was performed at a heating rate of 10 °C min<sup>-1</sup> in the temperature range of 25–800 °C under an air or Ar atmosphere (Shinadzu, DTG-60H). The element species and valence states were determined by X-ray photoelectron spectroscopy (XPS; ESCALab 250Xi).

**Electrochemical measurements:** Before the electrochemical evaluation,  $\text{Na}_2\text{MVF}_7$  (M = Mn, Fe, and Co) and Ketjen black (KB) were mixed by high-energy ball milling (8000D Mixer/Mill, SPEX SamplePrep) with a mass ratio of 7:2 for 30 min to enhance the electrical conductivity and reduce the particle size. The electrodes were prepared by mixing the ball-milled products (90 wt%) and poly(vinylidene fluoride) binder (10 wt%) in N-methyl-2-pyrrolidinone to obtain slurries, which were coated on aluminium foil and then dried in a vacuum oven at 80 °C. The typical mass loading of active material was about 1.5 mg cm<sup>-2</sup>. The electrochemical properties of  $\text{Na}_2\text{MVF}_7$  were evaluated using CR2032 coin-type cells, which were assembled in an argon-filled glovebox ( $\text{O}_2$  and  $\text{H}_2\text{O}$  < 0.1

ppm). For the fabrication of sodium-ion batteries, sodium metal was used as the counter electrode, 1 M NaClO<sub>4</sub> in ethylene carbonate (EC)/propylene carbonate (PC) (1:1 by volume) with 5% fluoroethylene carbonate additive was used as the electrolyte. And a Whatman glass-fiber separator was used for each cell. Cyclic voltammetry (CV) measurements were conducted on a PARSTAT 4000 electrochemical workstation in a voltage range from 1.5 to 4.5 V at scan rates of 0.1–1.0 mV s<sup>-1</sup>. Electrochemical impedance spectroscopy (EIS) was carried out in the frequency range of 10<sup>5</sup> Hz–0.01 Hz. The cells were galvanostatically cycled on a multi-channel battery test system (Land CT2001A) in the voltage range from 1.5 to 4.5 V.

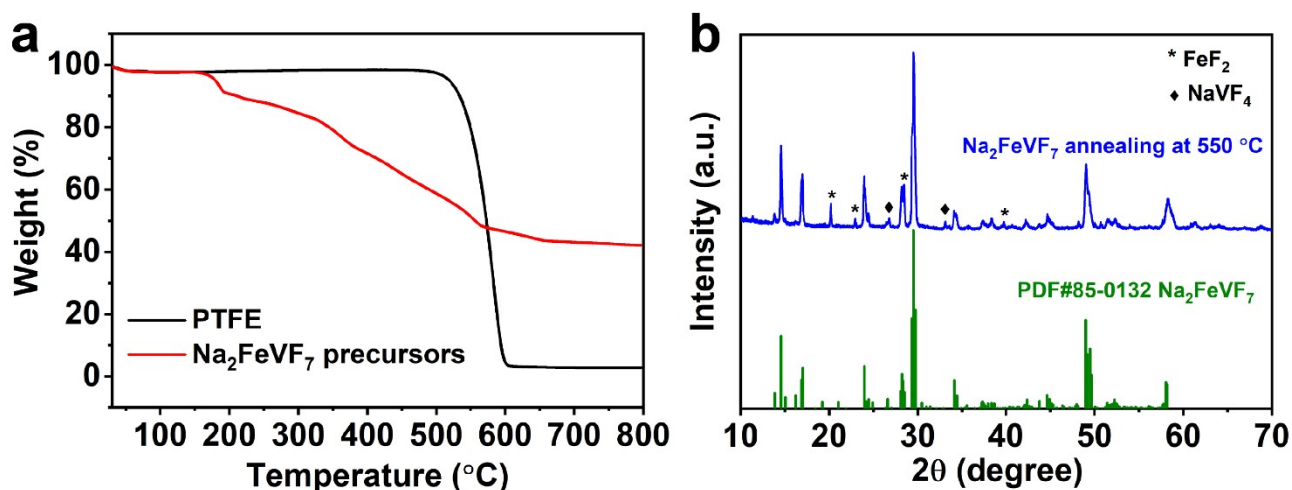

**Fig. S1.** (a) TGA curves of PTFE and the mixture of ball-milled Na<sub>2</sub>FeVF<sub>7</sub> precursors (NaF, FeC<sub>2</sub>O<sub>4</sub>·2H<sub>2</sub>O, NH<sub>4</sub>VO<sub>3</sub>, and PTFE) under an Ar atmosphere with a temperature ramp of 10 °C min<sup>-1</sup> from room temperature to 800 °C. (b) XRD pattern of the sample obtained after the first sintering.

As shown in **Fig. S1a**, the first sintering step at 550 °C is used to decompose of precursors and PTFE, which can produce a strong fluorinated environment. The second sintering step at 650 °C aims to eliminate a small amount of FeF<sub>2</sub> and NaVF<sub>4</sub> intermediate products after the first step of sintering to form the target product Na<sub>2</sub>FeVF<sub>7</sub> (**Fig. S1b**).

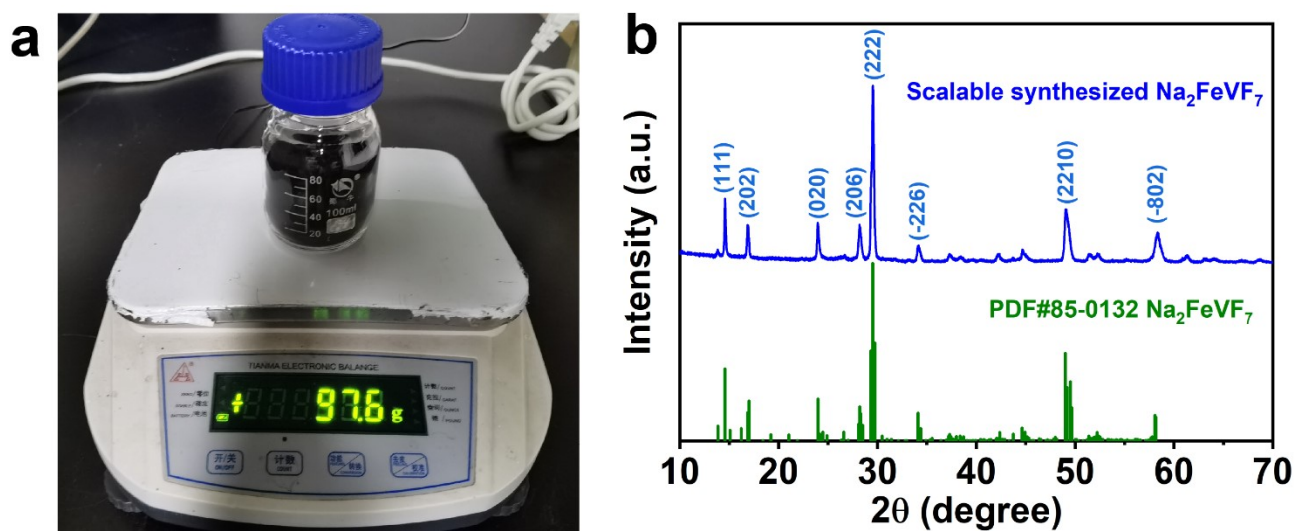

**Fig. S2.** (a) Digital image and (b) XRD pattern of the as-synthesized  $\sim 100$  gram-scale  $\text{Na}_2\text{FeVF}_7$  product.

**Table S1.** Crystallographic parameters of the Rietveld refinement for Na<sub>2</sub>MnVF<sub>7</sub>, Na<sub>2</sub>FeVF<sub>7</sub>, and Na<sub>2</sub>CoVF<sub>7</sub>.

| <b>Samples</b>                    | <b>Space groups</b>     | <b><i>a</i>/Å</b> | <b><i>b</i>/Å</b> | <b><i>c</i>/Å</b> | <b><i>β</i>/°</b> |
|-----------------------------------|-------------------------|-------------------|-------------------|-------------------|-------------------|
| Na <sub>2</sub> MnVF <sub>7</sub> | <i>P3<sub>2</sub>21</i> | 7.4783(7)         | 7.4783(7)         | 18.2296(2)        | 90                |
| Na <sub>2</sub> FeVF <sub>7</sub> | <i>C2/c</i>             | 12.7656(9)        | 7.4259(5)         | 24.6907(1)        | 100.17(8)         |
| Na <sub>2</sub> CoVF <sub>7</sub> | <i>C2/c</i>             | 12.7066(5)        | 7.3706(7)         | 24.5919(5)        | 99.98(4)          |

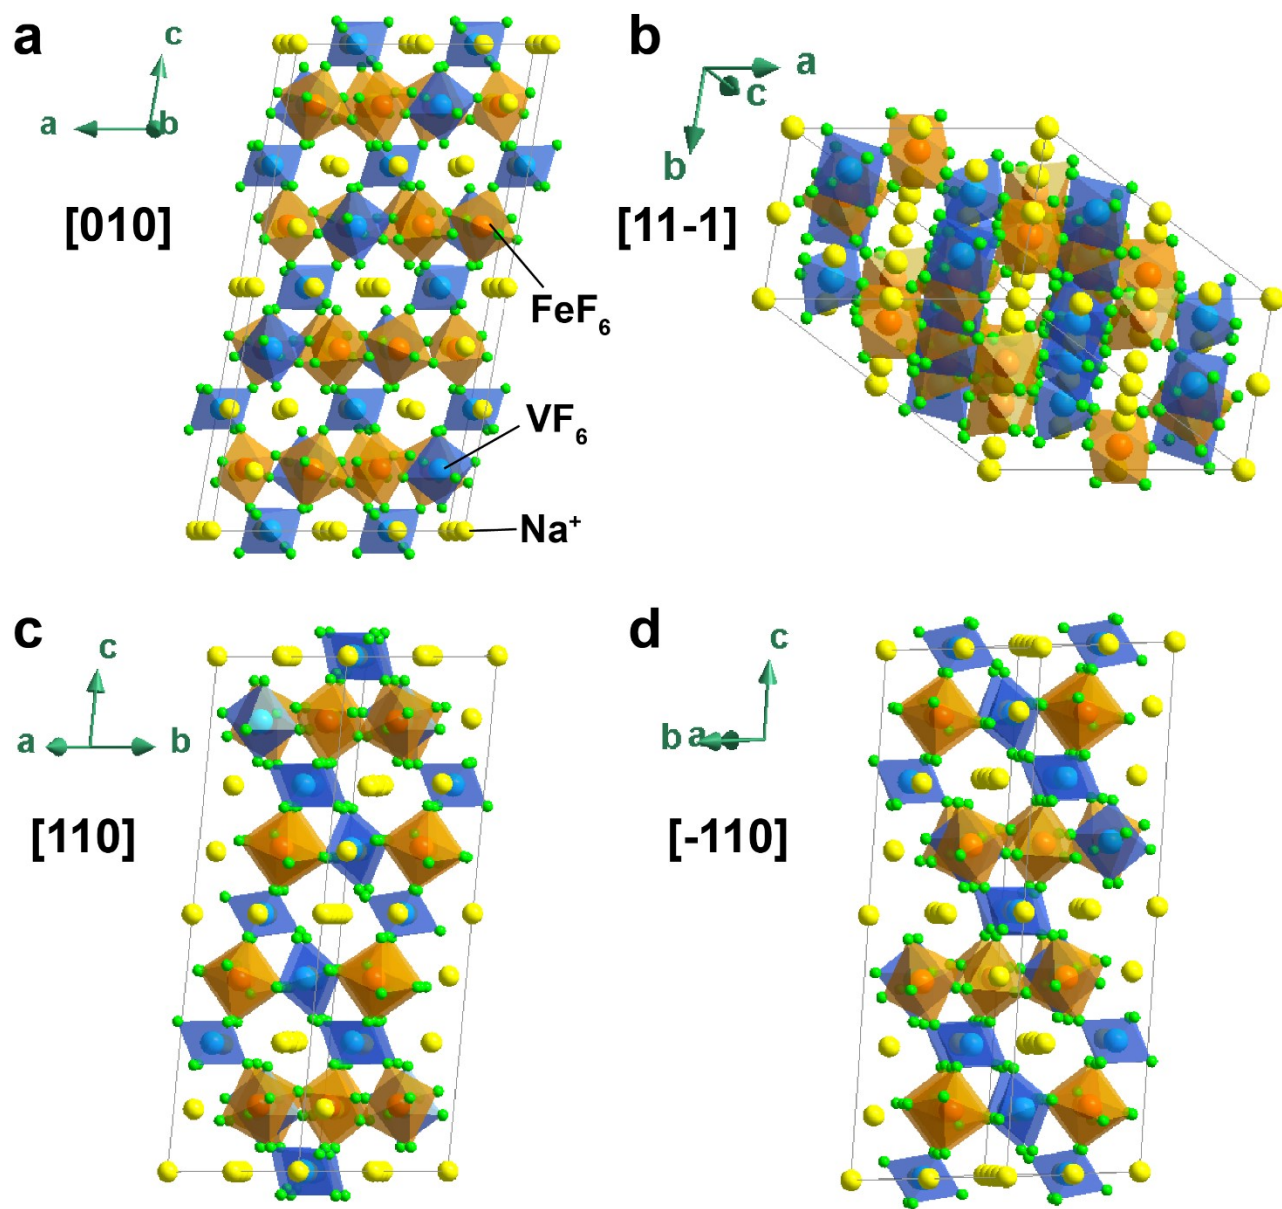

**Fig. S3.** Crystal structures of  $\text{Na}_2\text{FeVF}_7$  viewing from (a) [010], (b) [11-1], (c) [110], and (d) [1-10] directions.

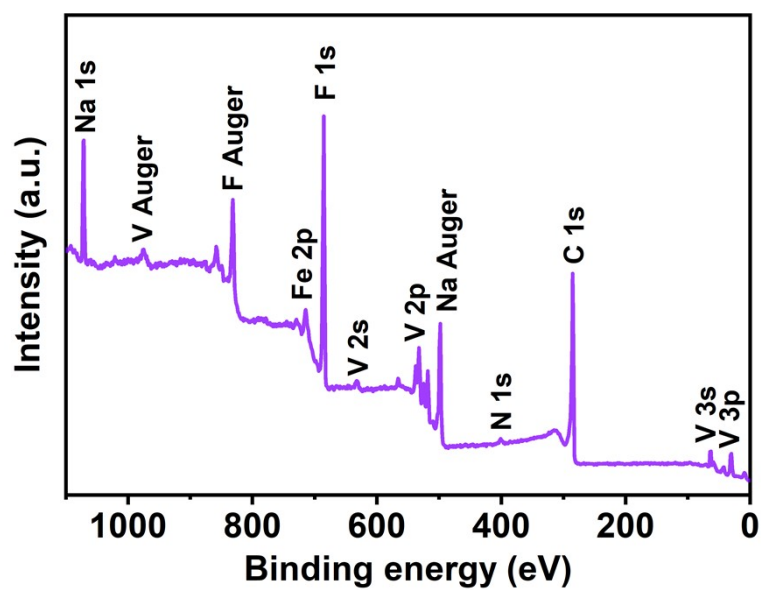

**Fig. S4.** XPS survey scan of  $\text{Na}_2\text{FeVF}_7$ .

As displayed in **Fig. S4**, the slight N 1s peak may be derived from the nitrogen-doped carbon obtained from the decomposition of the raw material  $\text{NH}_4\text{VO}_3$ .

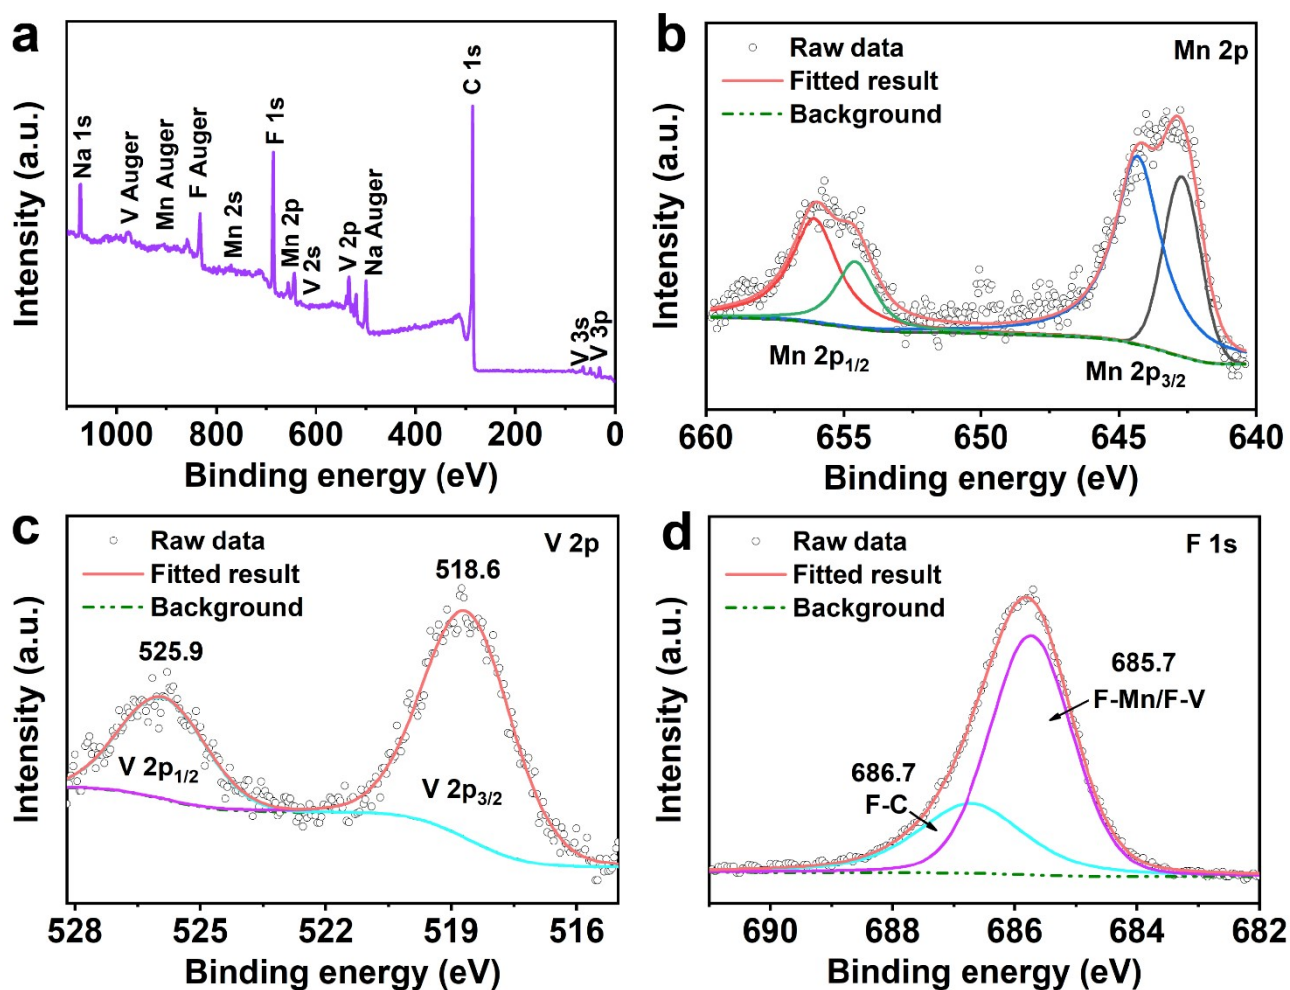

**Fig. S5.** XPS spectrum of  $\text{Na}_2\text{MnVF}_7$ : (a) Survey scan and high-resolution XPS spectra of (b) Mn 2p, (c) V 2p, and (d) F 1s.

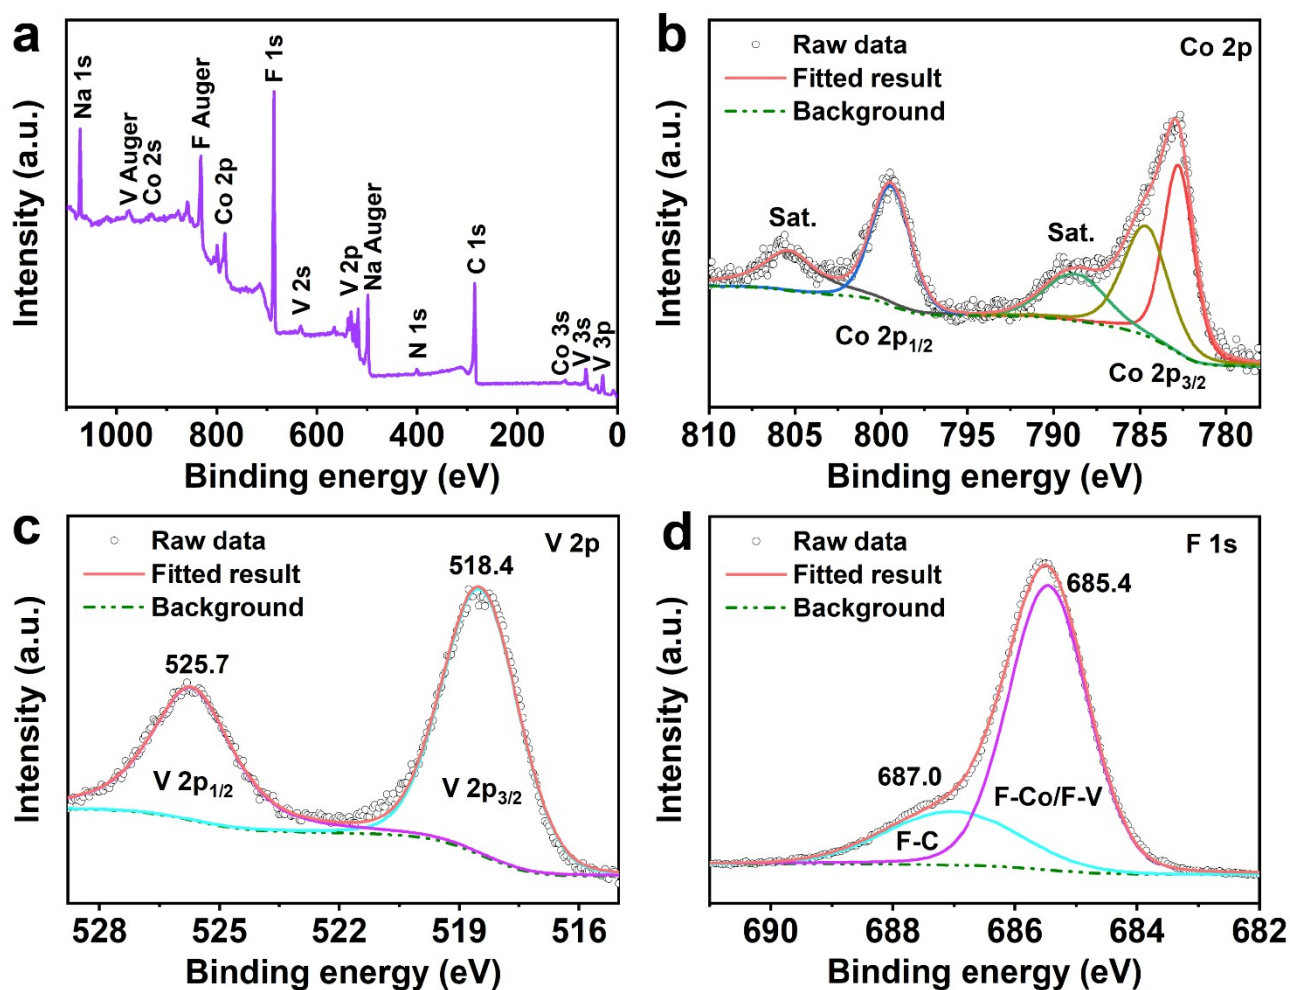

**Fig. S6.** XPS spectrum of  $\text{Na}_2\text{CoVF}_7$ : (a) Survey scan and high-resolution XPS spectra of (b) Co 2p, (c) V 2p, and (d) F 1s.

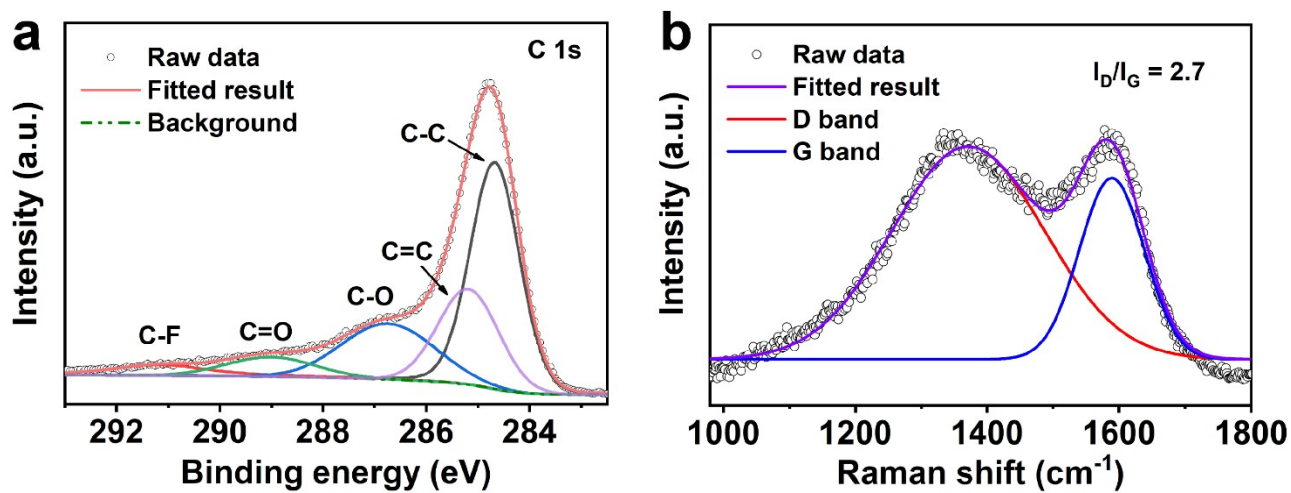

Fig. S7. (a) High-resolution C 1s XPS spectrum and (b) Raman spectrum of  $\text{Na}_2\text{FeVF}_7$ .

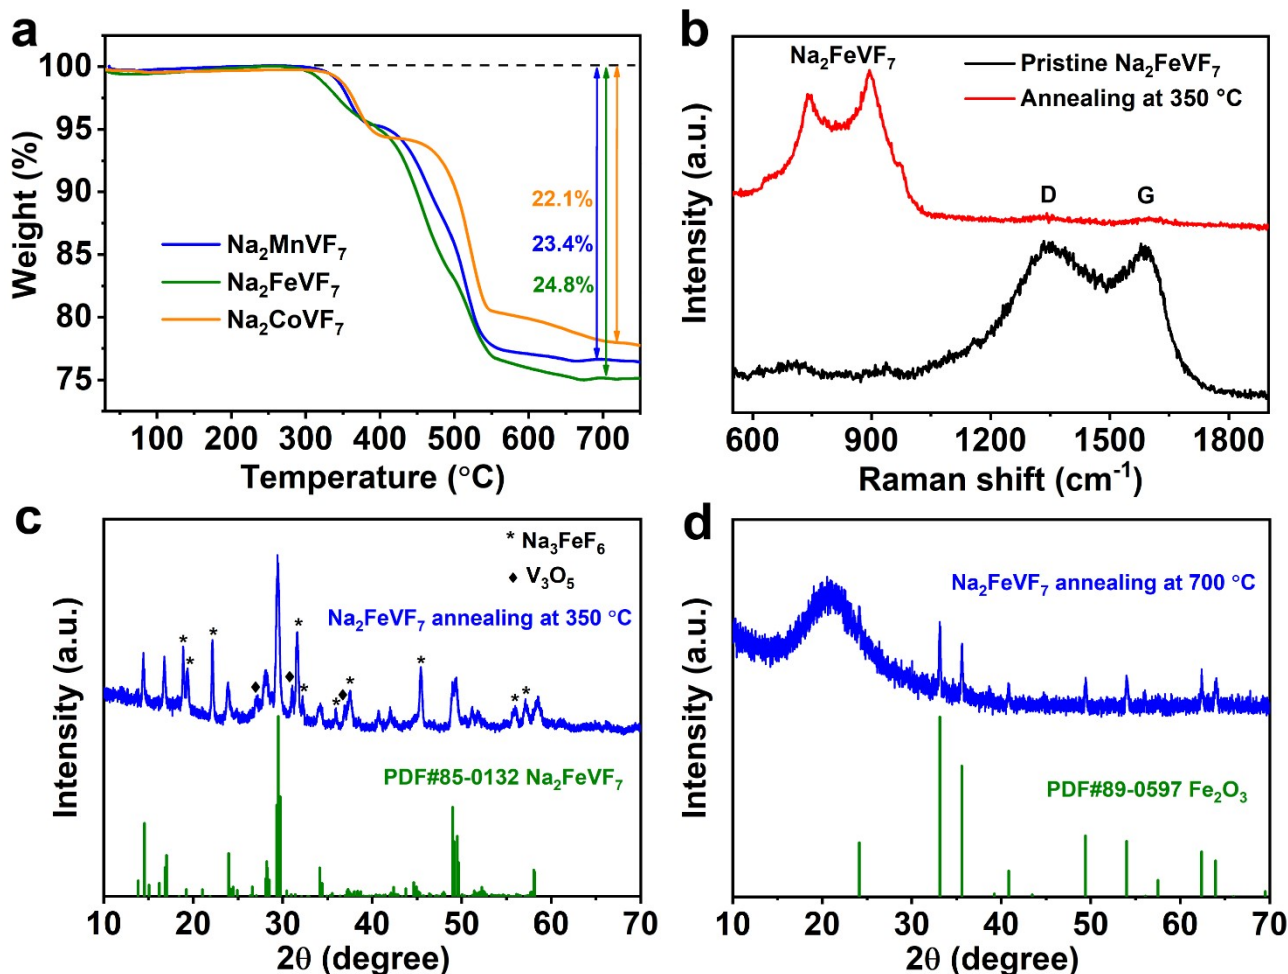

**Fig. S8.** (a) TGA curves of Na<sub>2</sub>MnVF<sub>7</sub>, Na<sub>2</sub>FeVF<sub>7</sub>, and Na<sub>2</sub>CoVF<sub>7</sub> under an air environment at a heating rate of 10 °C min<sup>-1</sup> from room temperature to 750 °C. (b) Raman spectra of Na<sub>2</sub>FeVF<sub>7</sub> before and after annealing at 350 °C in air. (c, d) XRD patterns of Na<sub>2</sub>FeVF<sub>7</sub> after annealing at 350 °C (c) and 700 °C (d) in air.

We choose Na<sub>2</sub>FeVF<sub>7</sub> sample as a representative to analyze the decomposition process (**Fig. S8a**). As shown in **Fig. S8b**, the characteristic D and G bands of carbon almost disappear after annealing at 350 °C in air. It means that the first weight loss plateau at about 350 °C is related to the oxidation of carbon and the partial decomposition of Na<sub>2</sub>FeVF<sub>7</sub> to form Na<sub>3</sub>FeF<sub>6</sub> and V<sub>3</sub>O<sub>5</sub> (**Fig. S8c**). After annealing at 700 °C, Na<sub>2</sub>FeVF<sub>7</sub> decomposes into Fe<sub>2</sub>O<sub>3</sub> and amorphous 2Na<sub>2</sub>O–V<sub>2</sub>O<sub>5</sub> (**Fig. S8d**). Therefore, the second weight loss plateau is the complete oxidation of fluorides. The F element is replaced by O<sub>2</sub> or H<sub>2</sub>O in the air to generate F<sub>2</sub>/HF gas. In materials containing F, F is easily replaced by O at high temperatures (*Adv. Energy Mater.*, 2018, **8**, 1801591). The weight loss of Na<sub>2</sub>FeVF<sub>7</sub> into

its oxidative products ( $2\text{Na}_2\text{O}-\text{V}_2\text{O}_5$  and  $\text{Fe}_2\text{O}_3$ ) is about 19.5%. Based on the weight losses displayed in **Fig. S8a**, the carbon content in  $\text{Na}_2\text{MnVF}_7$ ,  $\text{Na}_2\text{FeVF}_7$ , and  $\text{Na}_2\text{CoVF}_7$  is calculated to be approximately 4.8%, 6.6%, and 3.2%, respectively.

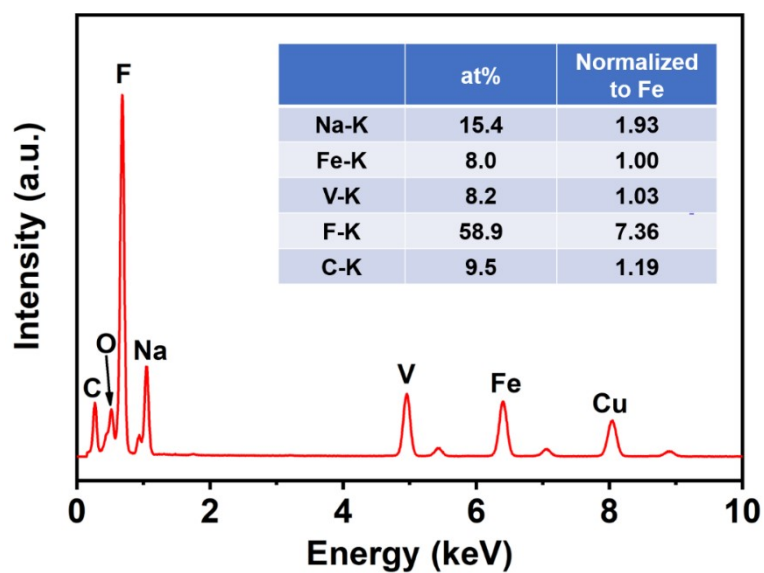

**Fig. S9.** EDX spectrum of  $\text{Na}_2\text{FeVF}_7$ .

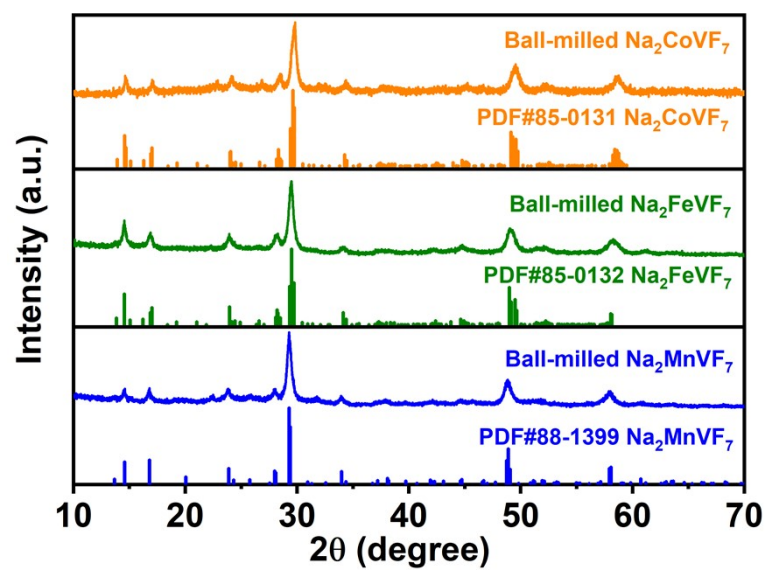

**Fig. S10.** XRD patterns of  $\text{Na}_2\text{MnVF}_7$ ,  $\text{Na}_2\text{FeVF}_7$ , and  $\text{Na}_2\text{CoVF}_7$  after high-energy ball milling with Ketjen black.

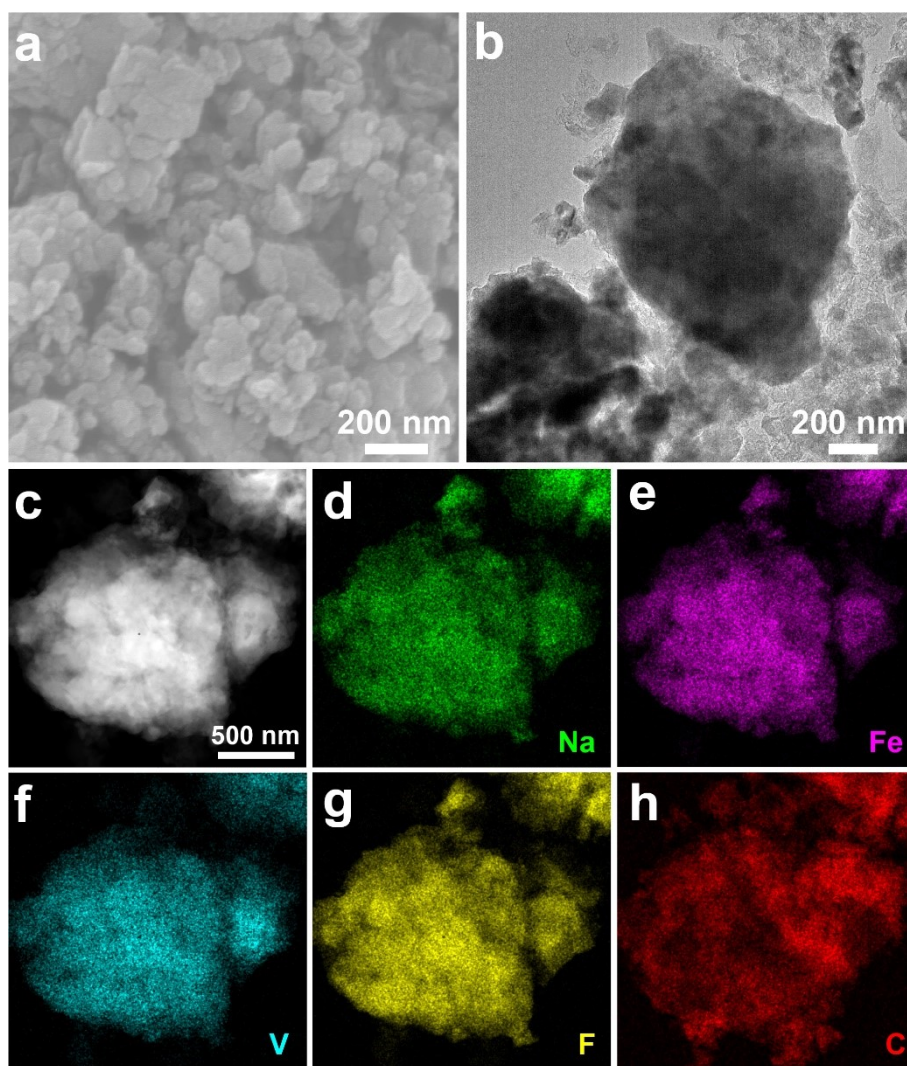

**Fig. S11.** (a) SEM image, (b) TEM image, (c) scanning transmission electron microscopy image, and (d–h) the corresponding elemental mapping images of the ball-milled  $\text{Na}_2\text{FeVF}_7$ .

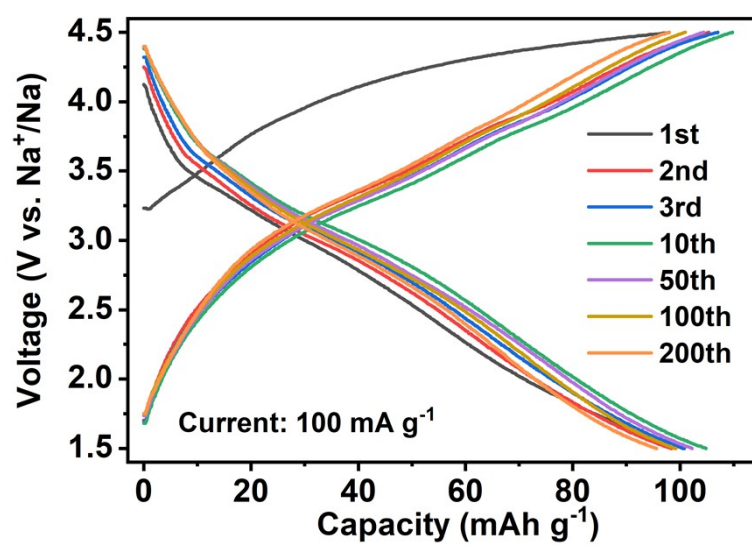

**Fig. S12.** Selected charge/discharge curves of the  $\text{Na}_2\text{FeVF}_7$  electrode at  $100 \text{ mA g}^{-1}$ .

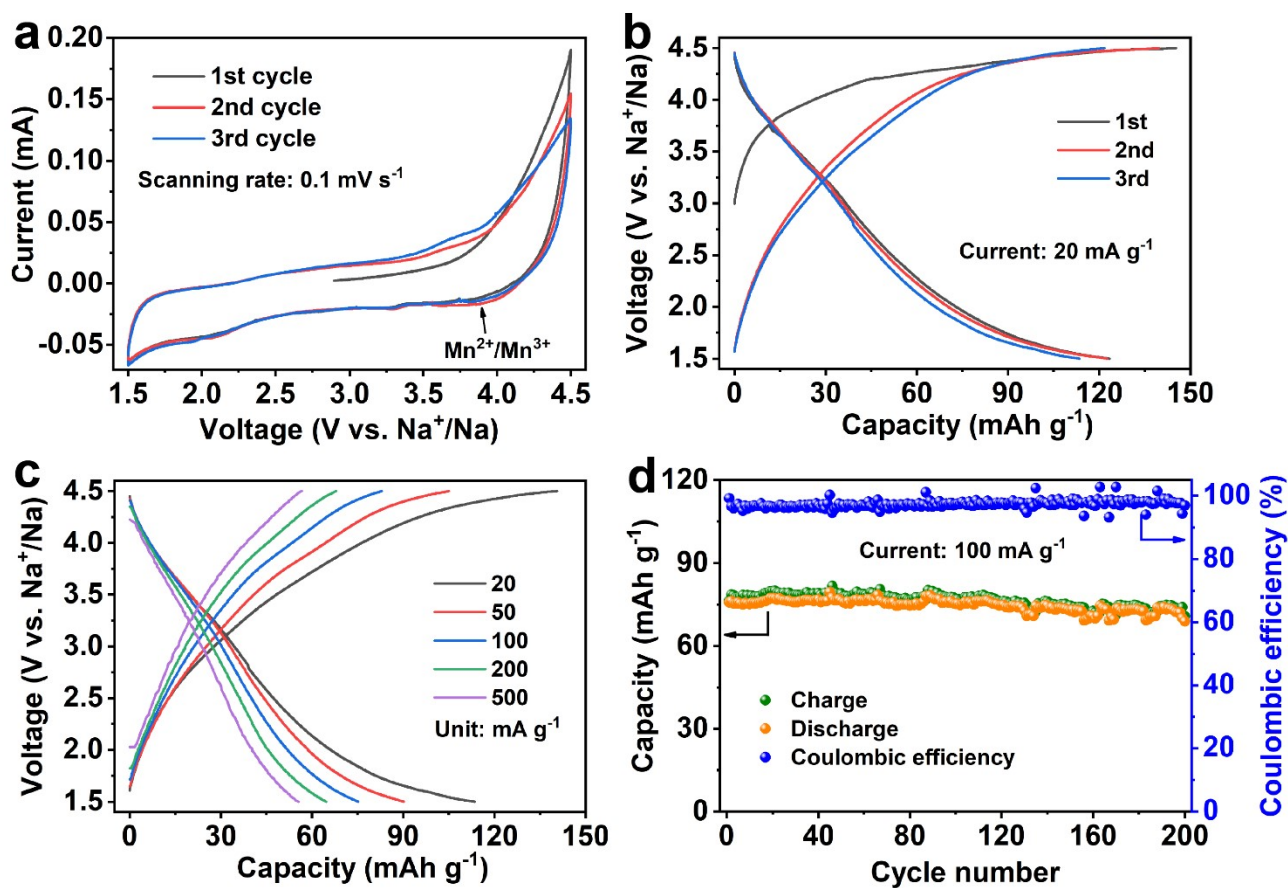

**Fig. S13.** Electrochemical performance of  $\text{Na}_2\text{MnVF}_7$ : (a) CV curves of the initial three cycles at a scan rate of  $0.1 \text{ mV s}^{-1}$ ; (b) charge/discharge profiles of the initial three cycles at a current density of  $50 \text{ mA g}^{-1}$ ; (c) charge/discharge curves at different current densities; (d) cycling performance at  $100 \text{ mA g}^{-1}$ .

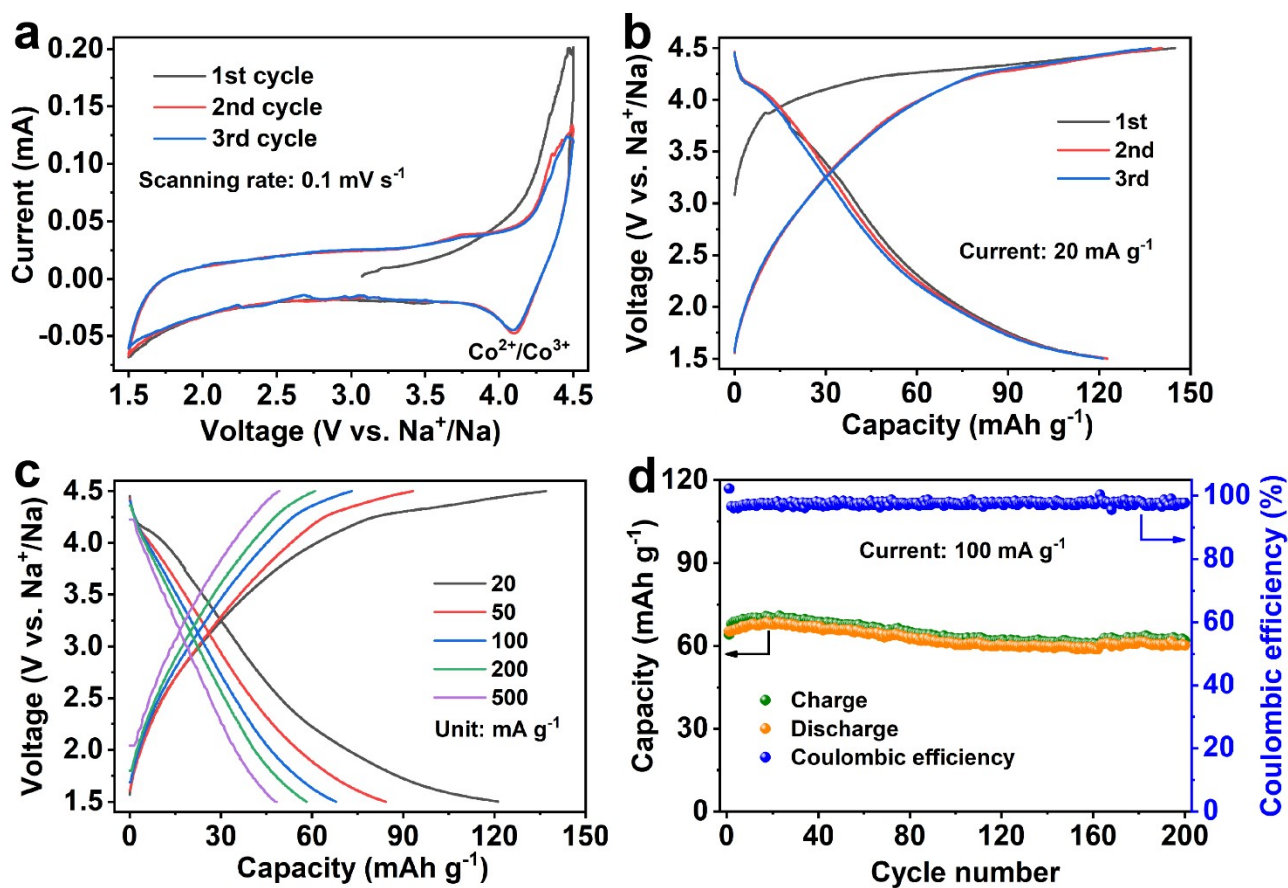

**Fig. S14.** Electrochemical properties of  $\text{Na}_2\text{CoVF}_7$ : (a) CV curves of the initial three cycles at  $0.1 \text{ mV s}^{-1}$ ; (b) charge/discharge profiles of the initial three cycles at  $50 \text{ mA g}^{-1}$ ; (c) charge/discharge curves at various current rates; (d) cycling performance at  $100 \text{ mA g}^{-1}$ .

**Table S2.** Comparison of sodium storage properties of Na<sub>2</sub>MVF<sub>7</sub> and other fluoride-based materials.

| Samples                                                     | Voltage range (V) | Initial charge/discharge capacity (mAh g <sup>-1</sup> ) | Cycling stability                                    | References       |
|-------------------------------------------------------------|-------------------|----------------------------------------------------------|------------------------------------------------------|------------------|
| FeF <sub>3</sub> ·0.5H <sub>2</sub> O                       | 1.2–4.0           | –/135                                                    | 78% after 50 cycles at 22 mA g <sup>-1</sup>         | 2                |
| FeF <sub>3</sub> /C                                         | 1.2–4.2           | –/149                                                    | 76% after 50 cycles at 20 mA g <sup>-1</sup>         | 3                |
| FeF <sub>3</sub> /graphene                                  | 1.5–4.2           | –/206                                                    | 51% after 50 cycles at 60 mA g <sup>-1</sup>         | 4                |
| K <sub>0.6</sub> FeF <sub>3</sub>                           | 1.5–4.5           | 127/140                                                  | 78% after 10 cycles at 20 mA g <sup>-1</sup>         | 5                |
| KFeF <sub>3</sub>                                           | 1.5–4.5           | 180/110                                                  | 95% after 35 cycles at 18 mA g <sup>-1</sup>         | 6                |
| NH <sub>4</sub> FeF <sub>3</sub>                            | 2.0–4.5           | 220/180                                                  | 85% after 100 cycles at 18 mA g <sup>-1</sup>        | 7                |
| Na <sub>3</sub> FeF <sub>6</sub>                            | 0.65–4.0          | –/180                                                    | 22% after 20 cycles at 17 mA g <sup>-1</sup>         | 8                |
| NaMnF <sub>3</sub>                                          | 1.0–4.5           | 165/130                                                  | 58% after 15 cycles at 8 mA g <sup>-1</sup>          | 9                |
| Orthorhombic Na <sub>2</sub> Fe <sub>2</sub> F <sub>7</sub> | 2.6–3.8           | 58/58                                                    | 86% after 30 cycles at 18 mA g <sup>-1</sup>         | 10               |
| Trigonal Na <sub>2</sub> Fe <sub>2</sub> F <sub>7</sub>     | 1.5–4.3           | 82/184                                                   | 88% after 1000 cycles at 368 mA g <sup>-1</sup>      | 11               |
| <b>Na<sub>2</sub>FeVF<sub>7</sub></b>                       | <b>1.5–4.5</b>    | <b>186/147</b>                                           | <b>95% after 200 cycles at 100 mA g<sup>-1</sup></b> | <b>This work</b> |
| Na <sub>2</sub> MnVF <sub>7</sub>                           | 1.5–4.5           | 146/124                                                  | 93% after 200 cycles at 100 mA g <sup>-1</sup>       | This work        |
| Na <sub>2</sub> CoVF <sub>7</sub>                           | 1.5–4.5           | 145/123                                                  | 92% after 200 cycles at 100 mA g <sup>-1</sup>       | This work        |

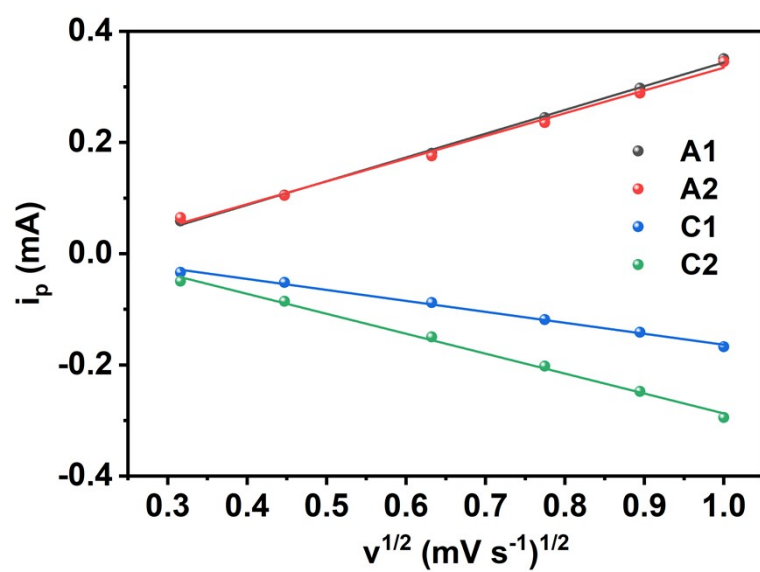

**Fig. S15.** Linear fitting for the peak current densities ( $i_p$ ) versus the square root of sweep rates ( $v^{1/2}$ ) achieved from CV curves of  $\text{Na}_2\text{FeVF}_7$ .

**Table S3.**  $\text{Na}^+$  diffusion coefficient of ( $D_{\text{Na}^+}$ ) of the  $\text{Na}_2\text{FeVF}_7$  electrode calculated from CV curves.

| Peak | $D_{\text{Na}^+}/10^{-11} \text{ cm}^2 \text{ s}^{-1}$ |
|------|--------------------------------------------------------|
| A1   | 7.7                                                    |
| A2   | 7.0                                                    |
| C1   | 1.6                                                    |
| C2   | 5.4                                                    |

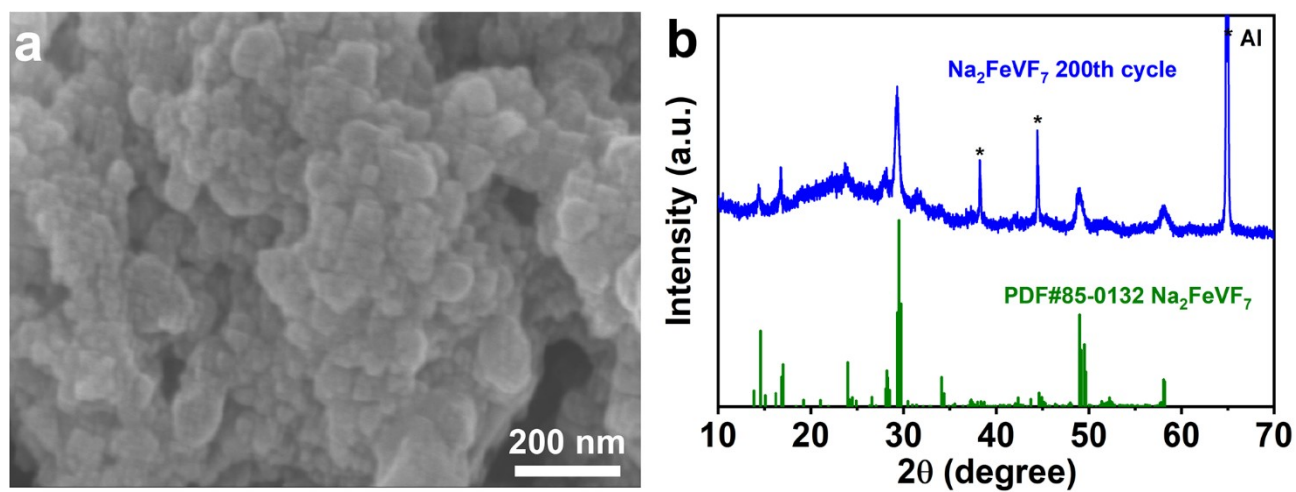

**Fig. S16.** (a) SEM image and (b) XRD pattern of the ball-milled  $\text{Na}_2\text{FeVF}_7$  electrode after 200 cycles.

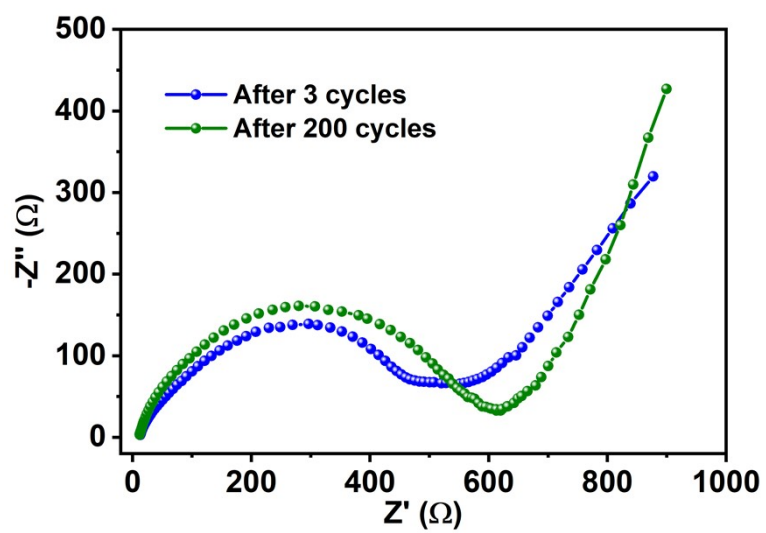

**Fig. S17.** EIS spectra of the ball-milled  $\text{Na}_2\text{FeVF}_7$  electrodes after 3 and 200 cycles.

## References

1. B. H. Toby, *J. Appl. Cryst.*, 2001, **34**, 210–213.
2. C. Li, C. Yin, L. Gu, R. E. Dinnebier, X. Mu, P. A. Aken and J. Maier, *J. Am. Chem. Soc.*, 2013, **135**, 11425–11428.
3. Z. Sun, W. Fu, M. Z. Liu, P. Lu, E. Zhao, A. Magasinski, M. Liu, S. Luo, J. McDaniel and G. Yushin, *J. Mater. Chem. A*, 2020, **8**, 4091–4098.
4. T. Bao, H. Zhong, H. Zheng, H. Zhan and Y. Zhou, *Mater. Lett.*, 2015, **158**, 21–24.
5. Y. Han, J. Hu, C. Yin, Y. Zhang, J. Xie, D. Yin and C. Li, *J. Mater. Chem. A*, 2016, **4**, 7382–7389.
6. D. Cao, C. Yin, D. Shi, Z. Fu, J. Zhang and C. Li, *Adv. Funct. Mater.*, 2017, **27**, 1701130.
7. A. Martin, E. S. Santiago, E. Kemnitz and N. Pinna, *ACS Appl. Mater. Interfaces*, 2019, **11**, 33132–33139.
8. E. E. Foley, A. Wong, R. C. Vincent, A. Manche, A. Zaveri, E. Gonzalez-Correa, G. Menard and R. J. Clement, *Phys. Chem. Chem. Phys.*, 2021, DOI: 10.1039/d1cp02763h.
9. J. Nava-Avendaño, M. E. A. Dompablo, C. Fronter, J. A. Ayllón and M. R. Palacín, *Solid State Ionics*, 2015, **278**, 106–113.
10. U. K. Dey, N. Barman, S. Ghosh, S. Sarkar, S. C. Peter and P. Senguttuvan, *Chem. Mater.*, 2019, **31**, 295–299.
11. H. Park, Y. Lee, M.-K. Cho, J. Kang, W. Ko, Y. H. Jung, T.-Y. Jeon, J. Hong, H. Kim, S.-T. Myung and J. Kim, *Energy Environ. Sci.*, 2021, **14**, 1469–1479.
